# Supplementary material for: Risk-stratification of HPV-positive women with low-grade cytology by FAM19A4/miR124-2 methylation and HPV genotyping
Source: PubMed Central journal article supplement (PMC8770638; doi:10.1038/s41416-021-01614-4), 2021-11-06
Supplement: 41416_2021_1614_MOESM1_ESM.pdf [file 41416_2021_1614_MOESM1_ESM.pdf]

**Supplementary Table 1.** Absolute CIN3+ risks for single and combined triage tests within the VUSA-Screen trial and POBASCAM trial separately

| Test result                           | N          | CIN3+ (n) | Absolute CIN3+ risk | 95% CI                |
|---------------------------------------|------------|-----------|---------------------|-----------------------|
| <b>VUSA-Screen study</b>              | <b>123</b> | <b>28</b> | <b>22.8%</b>        | <b>(15.4 - 30.2%)</b> |
| <i>Single triage tests</i>            |            |           |                     |                       |
| Methylation +                         | 47         | 19        | 40.4%               | (26.4 - 54.5%)        |
| Methylation -                         | 76         | 9         | 11.8%               | (4.6 - 19.1%)         |
| HPV16/18 +                            | 50         | 17        | 34.0%               | (20.9 - 47.1%)        |
| HPV16/18 -                            | 73         | 11        | 15.1%               | (6.9 - 23.3%)         |
| HPV 16/18/31/33/45 +                  | 75         | 23        | 30.7%               | (20.2 - 41.1%)        |
| HPV 16/18/31/33/45 -                  | 48         | 5         | 10.4%               | (1.8 - 19.0%)         |
| <i>Combined triage tests</i>          |            |           |                     |                       |
| HPV16/18 + and methylation +          | 24         | 11        | 45.8%               | (25.9 - 65.8%)        |
| HPV16/18 + and methylation -          | 26         | 6         | 23.1%               | (6.9 - 39.3%)         |
| HPV16/18 - and methylation +          | 23         | 8         | 34.8%               | (15.3 - 54.2%)        |
| HPV16/18 - and methylation -          | 50         | 3         | 6.0%                | (0 - 12.6%)           |
| HPV16/18/31/33/45 + and methylation + | 33         | 15        | 45.5%               | (28.5 - 62.4%)        |
| HPV16/18/31/33/45 + and methylation - | 42         | 8         | 19.0%               | (7.2 - 30.9%)         |
| HPV16/18/31/33/45 - and methylation + | 14         | 4         | 28.6%               | (4.9 - 52.2%)         |
| HPV16/18/31/33/45 - and methylation - | 34         | 1         | 2.9%                | (0 - 8.6%)            |
| <b>POBASCAM study</b>                 | <b>171</b> | <b>29</b> | <b>17.0%</b>        | <b>(11.3 - 22.6%)</b> |
| <i>Single triage tests</i>            |            |           |                     |                       |
| Methylation +                         | 74         | 21        | 28.4%               | (18.1 - 38.7%)        |
| Methylation -                         | 97         | 8         | 8.2%                | (2.8 - 13.7%)         |
| HPV16/18 +                            | 77         | 18        | 23.4%               | (13.9 - 32.8%)        |
| HPV16/18 -                            | 94         | 11        | 11.7%               | (5.2 - 18.2%)         |
| HPV 16/18/31/33/45 +                  | 120        | 25        | 20.8%               | (13.6 - 28.1%)        |
| HPV 16/18/31/33/45 -                  | 51         | 4         | 7.8%                | (0.5 - 15.2%)         |
| <i>Combined triage tests</i>          |            |           |                     |                       |
| HPV16/18 + and methylation +          | 38         | 14        | 36.8%               | (21.5 - 52.2%)        |
| HPV16/18 + and methylation -          | 39         | 4         | 10.3%               | (0.7 - 19.8%)         |
| HPV16/18 - and methylation +          | 36         | 7         | 19.4%               | (6.5 - 32.4%)         |
| HPV16/18 - and methylation -          | 58         | 4         | 6.9%                | (0.4 - 13.4%)         |
| HPV16/18/31/33/45 + and methylation + | 61         | 18        | 29.5%               | (18.1 - 41.0%)        |
| HPV16/18/31/33/45 + and methylation - | 59         | 7         | 11.9%               | (3.6 - 20.1%)         |
| HPV16/18/31/33/45 - and methylation + | 13         | 3         | 23.1%               | (0.2 - 46.0%)         |
| HPV16/18/31/33/45 - and methylation - | 38         | 1         | 2.6%                | (0 - 7.7%)            |

Abbreviations: N, group total; n, number of CIN3+ detected; CIN3+, cervical intraepithelial neoplasia grade 3 or worse; 95% CI, 95% confidence interval; +, positive; -, negative
